# Supplementary material
Source: Springer Nature journal article supplement (https://www.springermedizin.de/resource/supplementary/13034_2012_193_MOESM2_ESM.pdf/9652514)
Supplement: MOESM2 [file 9652514]

| Scale                                                   | No. items | $\alpha$   | Item-total-correlation range / marker items of the subscales (one per facet)                                                                                                                                                            |
|---------------------------------------------------------|-----------|------------|-----------------------------------------------------------------------------------------------------------------------------------------------------------------------------------------------------------------------------------------|
| AIDA total score:<br><b>Identity Diffusion</b>          | <b>58</b> | <b>.94</b> |                                                                                                                                                                                                                                         |
| <b>1. Discontinuity</b>                                 | <b>27</b> | <b>.86</b> | $r_{it} = .30 - .66$ , $\emptyset .45$                                                                                                                                                                                                  |
| 1.1 Discontinuity concerning <b>attributes / goals</b>  | 9         | .73        | 5: I could list a few things that I can do very well.(-)<br>58: I don't remember how I felt and thought as a child, I am now like a different person.<br>17: I can trust my inner voice, it usually leads me in the right direction.(-) |
| 1.2 ... <b>relationships / roles</b>                    | 11        | .76        | 54: My friendships usually last only a few months.<br>18: I feel I don't really belong anywhere.<br>10: When I look in the mirror, I am often surprised and don't like how I have changed.                                              |
| 1.3 ... <b>emotional self reflection</b>                | 7         | .76        | 3: I often don't know how I feel right now.<br>11: I'm not sure if my friends really like me.                                                                                                                                           |
| <b>2. Incoherence</b>                                   | <b>31</b> | <b>.92</b> | $r_{it} = .39 - .72$ , $\emptyset .54$                                                                                                                                                                                                  |
| 2.1 Incoherence concerning <b>consistent self image</b> | 11        | .86        | 12: When people see me in new situations, they are very surprised how I can be.<br>4: I feel that I have different faces that do not fit together well.<br>13: I often feel lost, as if I had no clear inner self.                      |
| 2.2 ... <b>autonomy / Ego Strength</b>                  | 12        | .84        | 42: When I'm alone I feel helpless.<br>38: If I am criticized or others see me failing, I feel really worthless and "devastated".<br>36: If someone has offended me, I don't want to talk to him or her ever again.                     |
| 2.3 ... <b>cognitive self reflection</b>                | 8         | .76        | 51: I often have a block when I ask myself why I did things.<br>35: I am confused about what kind of person I really am.                                                                                                                |
